# Supplementary material
Source: Research Square preprint supplement (doi:10.21203/rs.3.rs-9948560/v1)
Supplement: Supplementary file 1 [file 44652b0efbef829ad135542c.docx]

| **Model acronym** | **Institution** | **Atmosphere resolution (lat × lon)** |
| --- | --- | --- |
| ACCESS-CM2 | Australian Community Climate and Earth System Simulator (ACCESS), Australia | 145x192 |
| AWI-CM-1-1-MR | Alfred Wegener Institute (AWI), Germany | 192x192 |
| BCC-CSM2-MR | Beijing Climate Center (BCC), China | 160x320 |
| CanESM5-CanOE | Canadian Centre for Climate Modelling and Analysis (CCCma), Canada | 64x128 |
| CESM2 | National Center for Atmospheric Research (NCAR), USA | 192x288 |
| CIESM | Community Integrated Earth System Model (CIESM), China | 128x256 |
| CMCC-CM2-SR5 | Centro Euro-Mediterraneo sui Cambiamenti Climatici (CMCC), Italy | 192x288 |
| CMCC-ESM2 | CMCC, Italy | 192x288 |
| CNRM-CM6-1 | CNRM/CERFACS, France | 128x256 |
| CNRM-CM6-1-HR | CNRM/CERFACS, France | 256x512 |
| CNRM-ESM2-1 | CNRM/CERFACS, France | 128x256 |
| EC-Earth3-CC | EC-Earth Consortium, EU | 256x512 |
| EC-Earth3-Veg-LR | EC-Earth Consortium, EU | 256x512 |
| FGOALS-g3 | Chinese Academy of Sciences (CAS), China | 80x180 |
| FIO-ESM-2-0 | First Institute of Oceanography (FIO), China | 192x288 |
| GFDL-ESM4 | NOAA Geophysical Fluid Dynamics Laboratory (GFDL), USA | 180x288 |
| HadGEM3-GC31-LL | Met Office Hadley Centre (MOHC), UK | 144x192 |
| HadGEM3-GC31-MM | Met Office Hadley Centre (MOHC), UK | 192x192 |
| INM-CM4-8 | Institute of Numerical Mathematics (INM), Russia | 120x180 |
| INM-CM5-0 | Institute of Numerical Mathematics (INM), Russia | 120x180 |
| IPSL-CM6A-LR | Institut Pierre-Simon Laplace (IPSL), France | 143x144 |
| KIOST-ESM | Korea Institute of Ocean Science & Technology (KIOST), Korea | 144x192 |
| MIROC-ES2L | University of Tokyo/NIES/JAMSTEC, Japan | 64x128 |
| MIROC6 | University of Tokyo/NIES/JAMSTEC, Japan | 128x256 |
| MPI-ESM1-2-LR | Max Planck Institute for Meteorology (MPI-M), Germany | 192x384 |
| NESM3 | Nanjing University of Information Science & Technology (NUIST), China | 96x192 |
| TaiESM1 | Academia Sinica, Taiwan | 144x192 |
| UKESM1-0-LL | Met Office Hadley Centre + NERC, UK | 144x192 |

Table S1. Description of the climate models employed in this study. Model acronyms, associated modeling centers, and atmospheric grid resolutions (lat × lon) are provided for all CMIP6 models analyzed.

|  | Q700-500 | T2m | MTLR | UTLR | WS500 | DD850 |
| --- | --- | --- | --- | --- | --- | --- |
| All | 0.59 | 0.50 | 0.16 | 0.22 | -0.11 | 0.23 |
| Yukon | 0.66 | 0.66 | 0.01 | 0.27 | -0.16 | 0.27 |
| Northwest | 0.46 | 0.33 | 0.18 | 0.22 | -0.13 | 0.21 |
| Nunavut | 0.27 | 0.31 | 0.20 | 0.26 | -0.04 | 0.23 |

Table S2. Pearson correlation coefficients () between seasonal (May–September) dry lightning counts and environmental variables for 1999–2023. Bold indicates (moderate association by our convention).


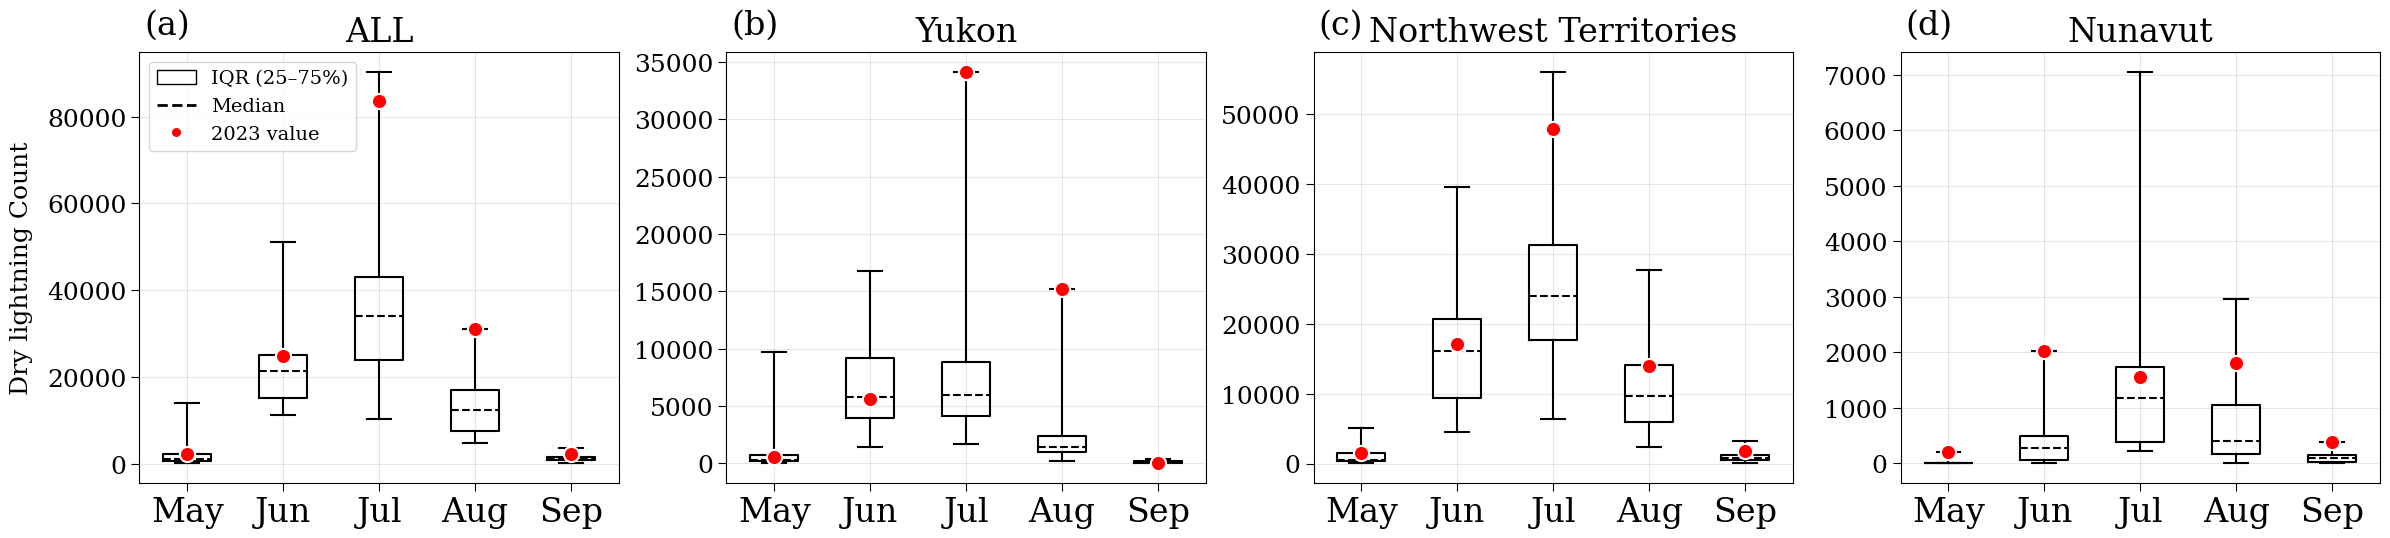
Figure S1. Monthly distributions (May–September 1999–2023) of dry lightning flashes across Canada’s three northern territories. Box-and-whisker plots show medians (dashed lines) and interquartile ranges (boxes, 25–75%); whiskers indicate the full range. Red dots mark 2023 values. Panels: (a) ALL, (b) Yukon, (c) Northwest Territories, (d) Nunavut.


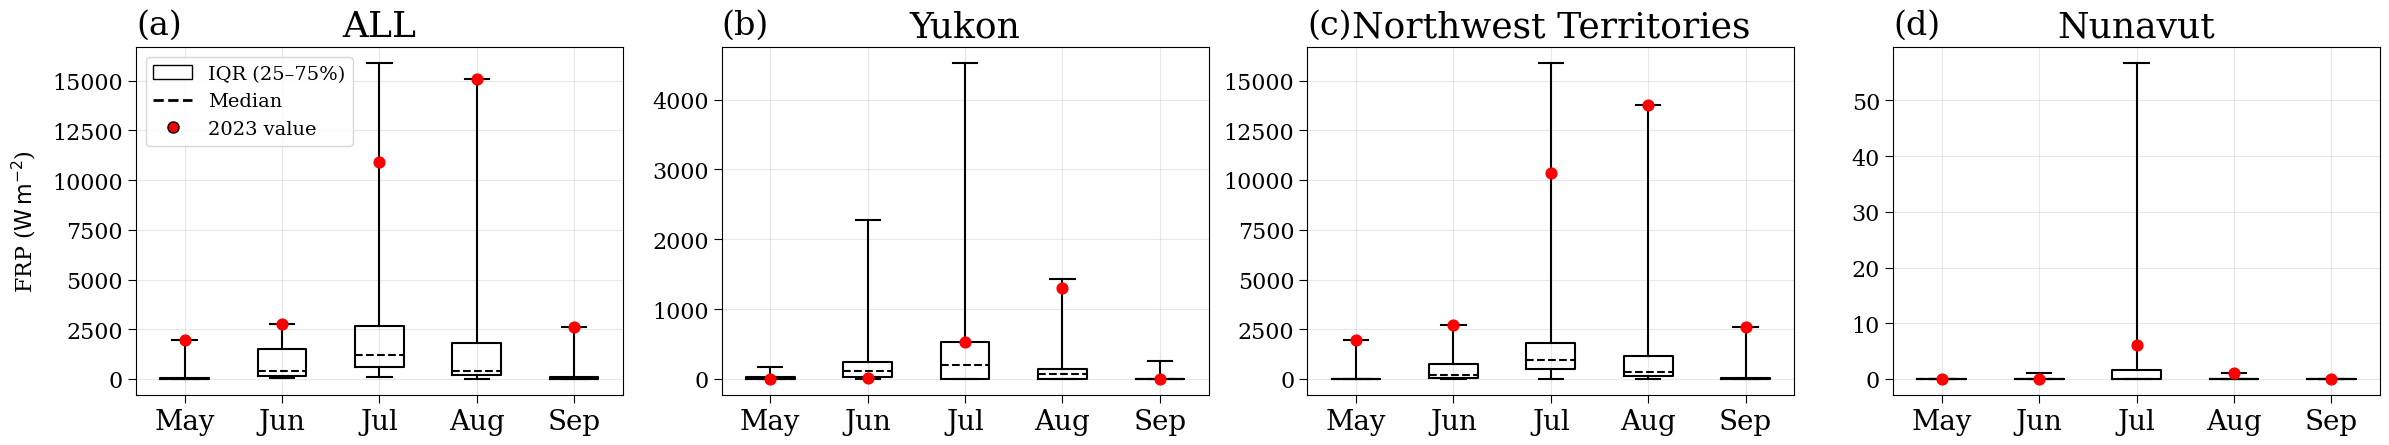


Figure S2. Monthly distributions (May–September 1999–2023) of Fire Radiative Power (FRP) across Canada’s three northern territories. Box-and-whisker plots show medians (dashed lines) and interquartile ranges (boxes, 25–75%); whiskers indicate the full range. Red dots mark 2023 values. Panels: (a) ALL, (b) Yukon, (c) Northwest Territories, (d) Nunavut.


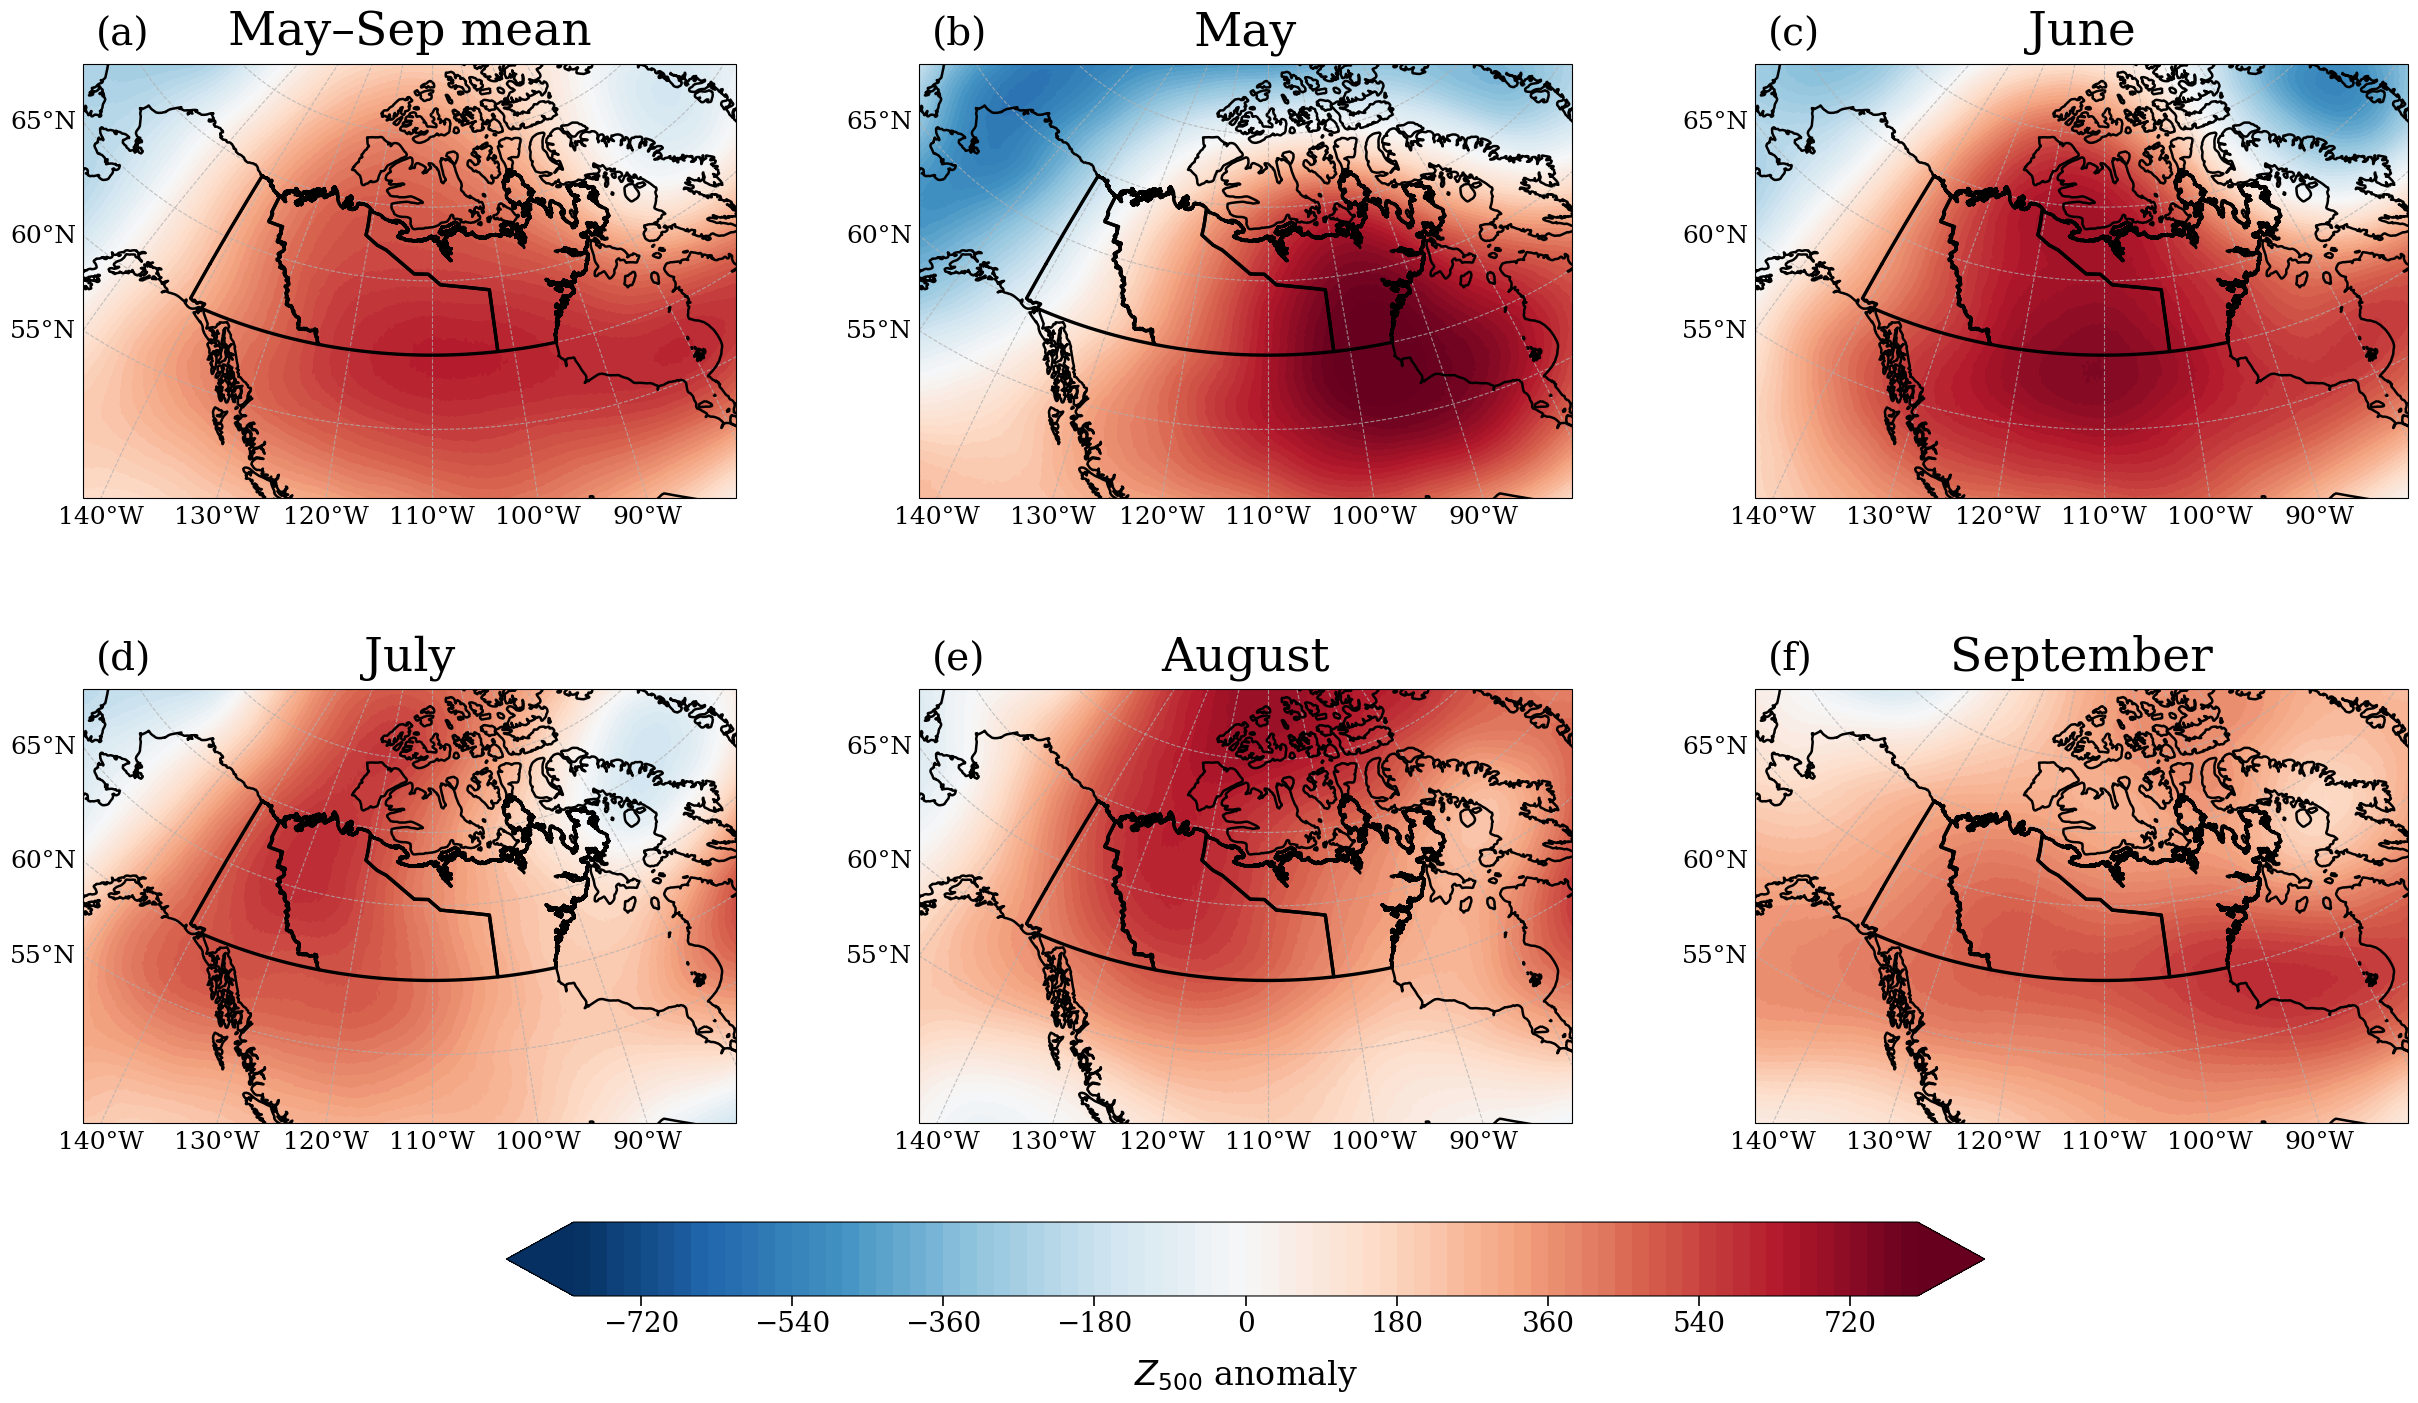


Figure S3. Three-month running-mean anomalies of 500-hPa geopotential height (Z500) in 2023 over northern Canada. Panels show (a) May–September mean and monthly fields and for each month from May to September (b–f).


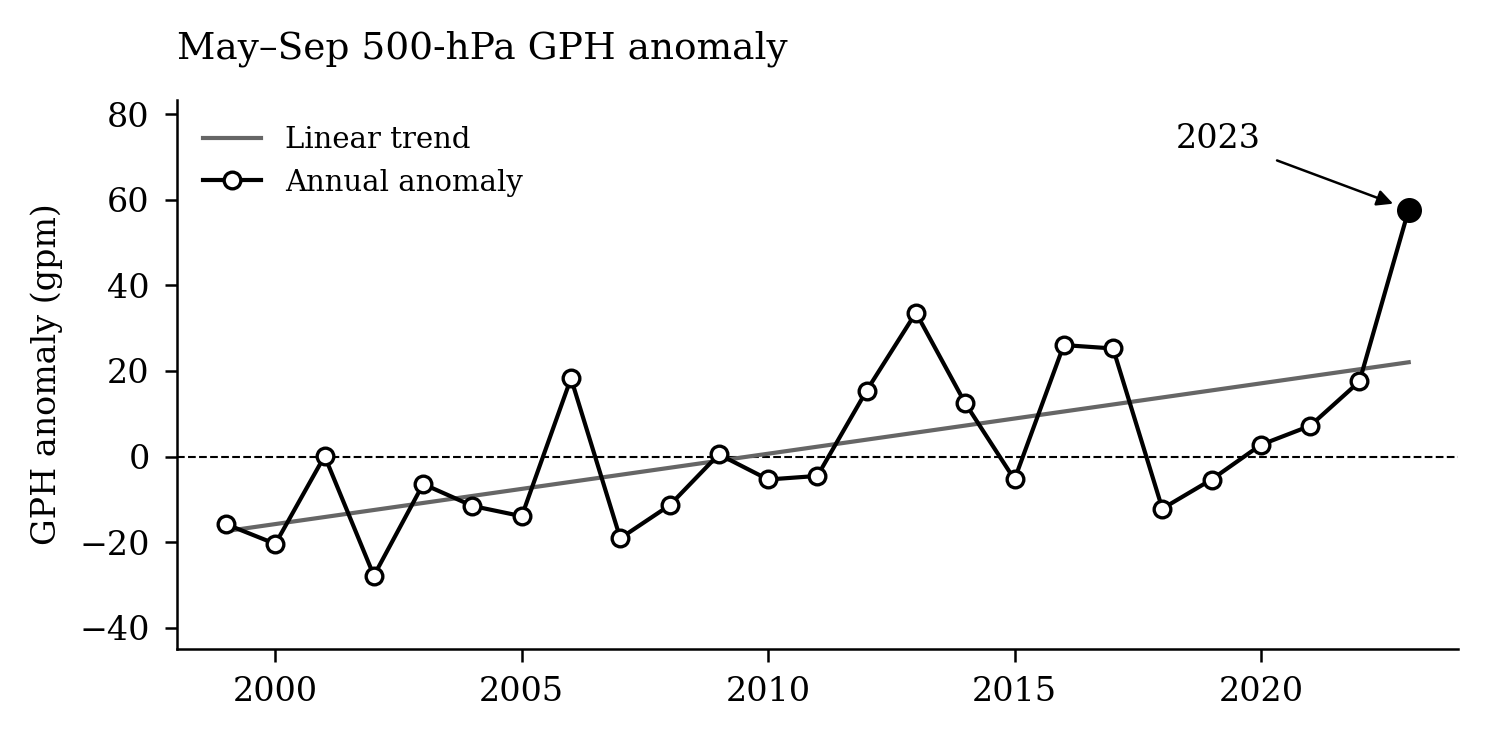


Figure S4. Time series of May–September 500-hPa geopotential height anomalies. Area-averaged 500-hPa geopotential height (GPH) anomalies (in geopotential meters, gpm) over northern Canada from 1999 to 2023.


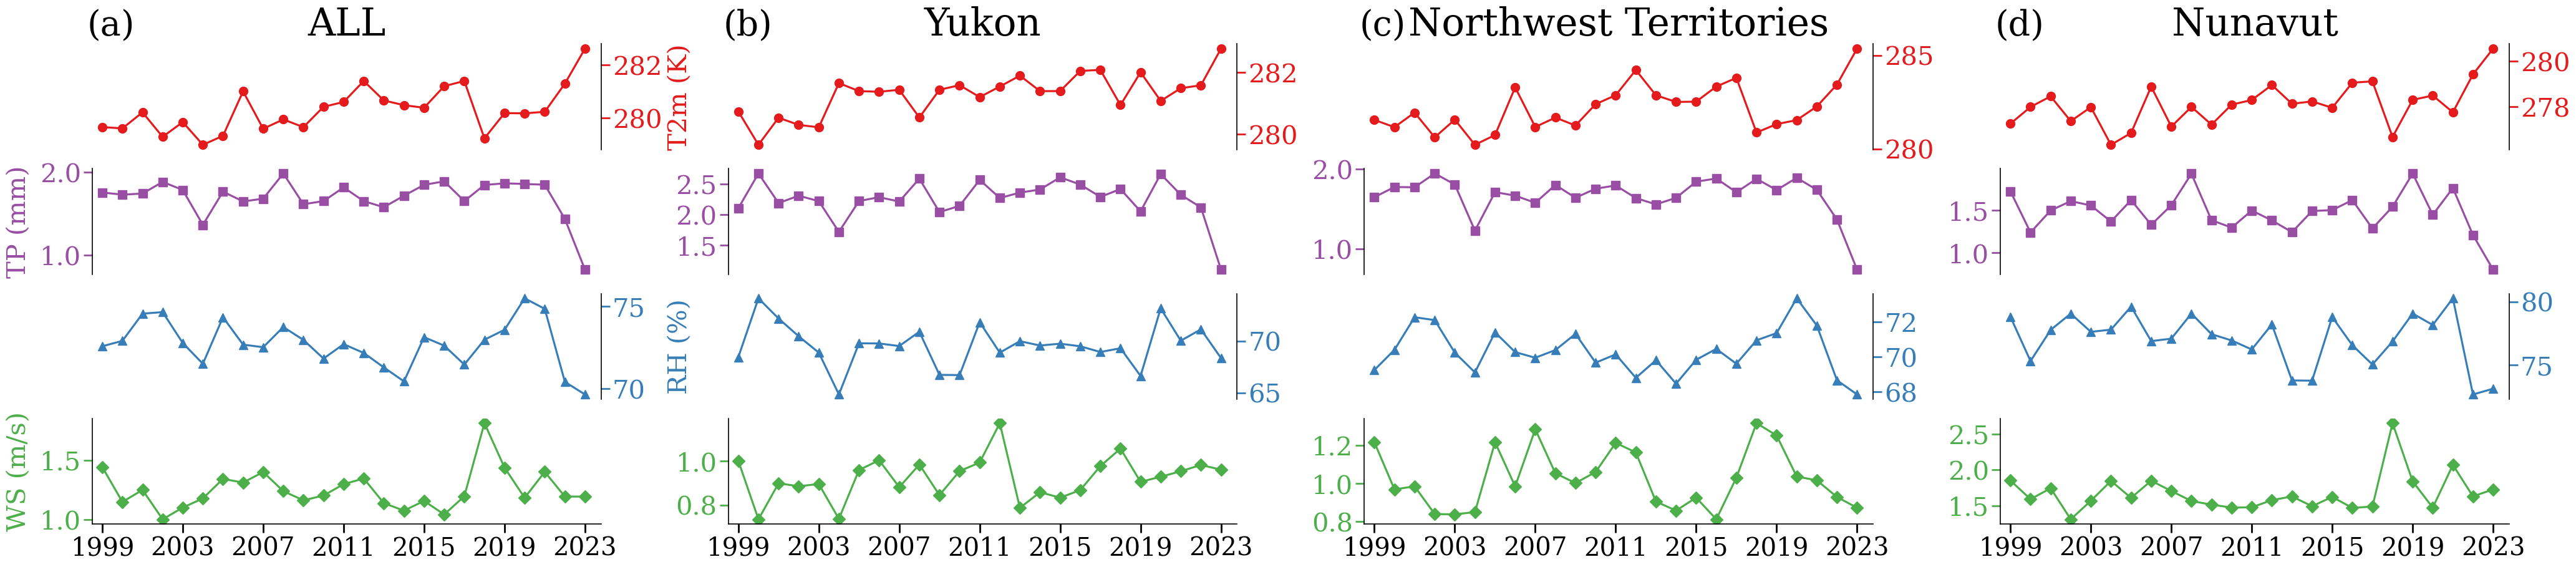


Figure S5. Interannual evolution (1999–2023) of May–September regional means for four Fire Weather Index (FWI) components—2-m air temperature (T2m), Total precipitation (TP), and relative humidity (RH), wind speed (WS)—averaged over (a) ALL, (b) Yukon, (c) Northwest Territories, and (d) Nunavut.


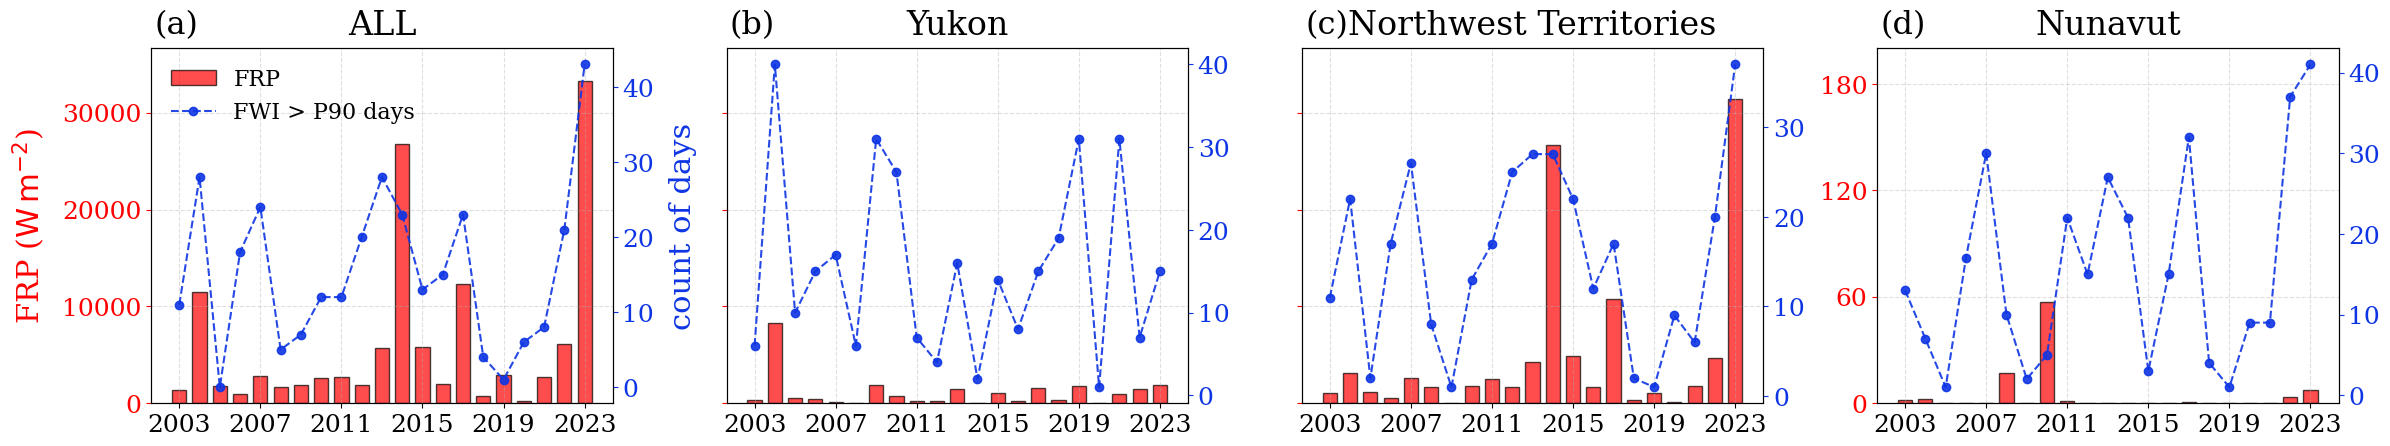


Figure S6. Seasonal (May–September) Fire Radiative Power (FRP; red bars, left axis) and number of days with Fire Weather Index above the 90th-percentile threshold (blue line, right axis) for northern Canada: (a) ALL, (b) Yukon, (c) Northwest Territories, (d) Nunavut.


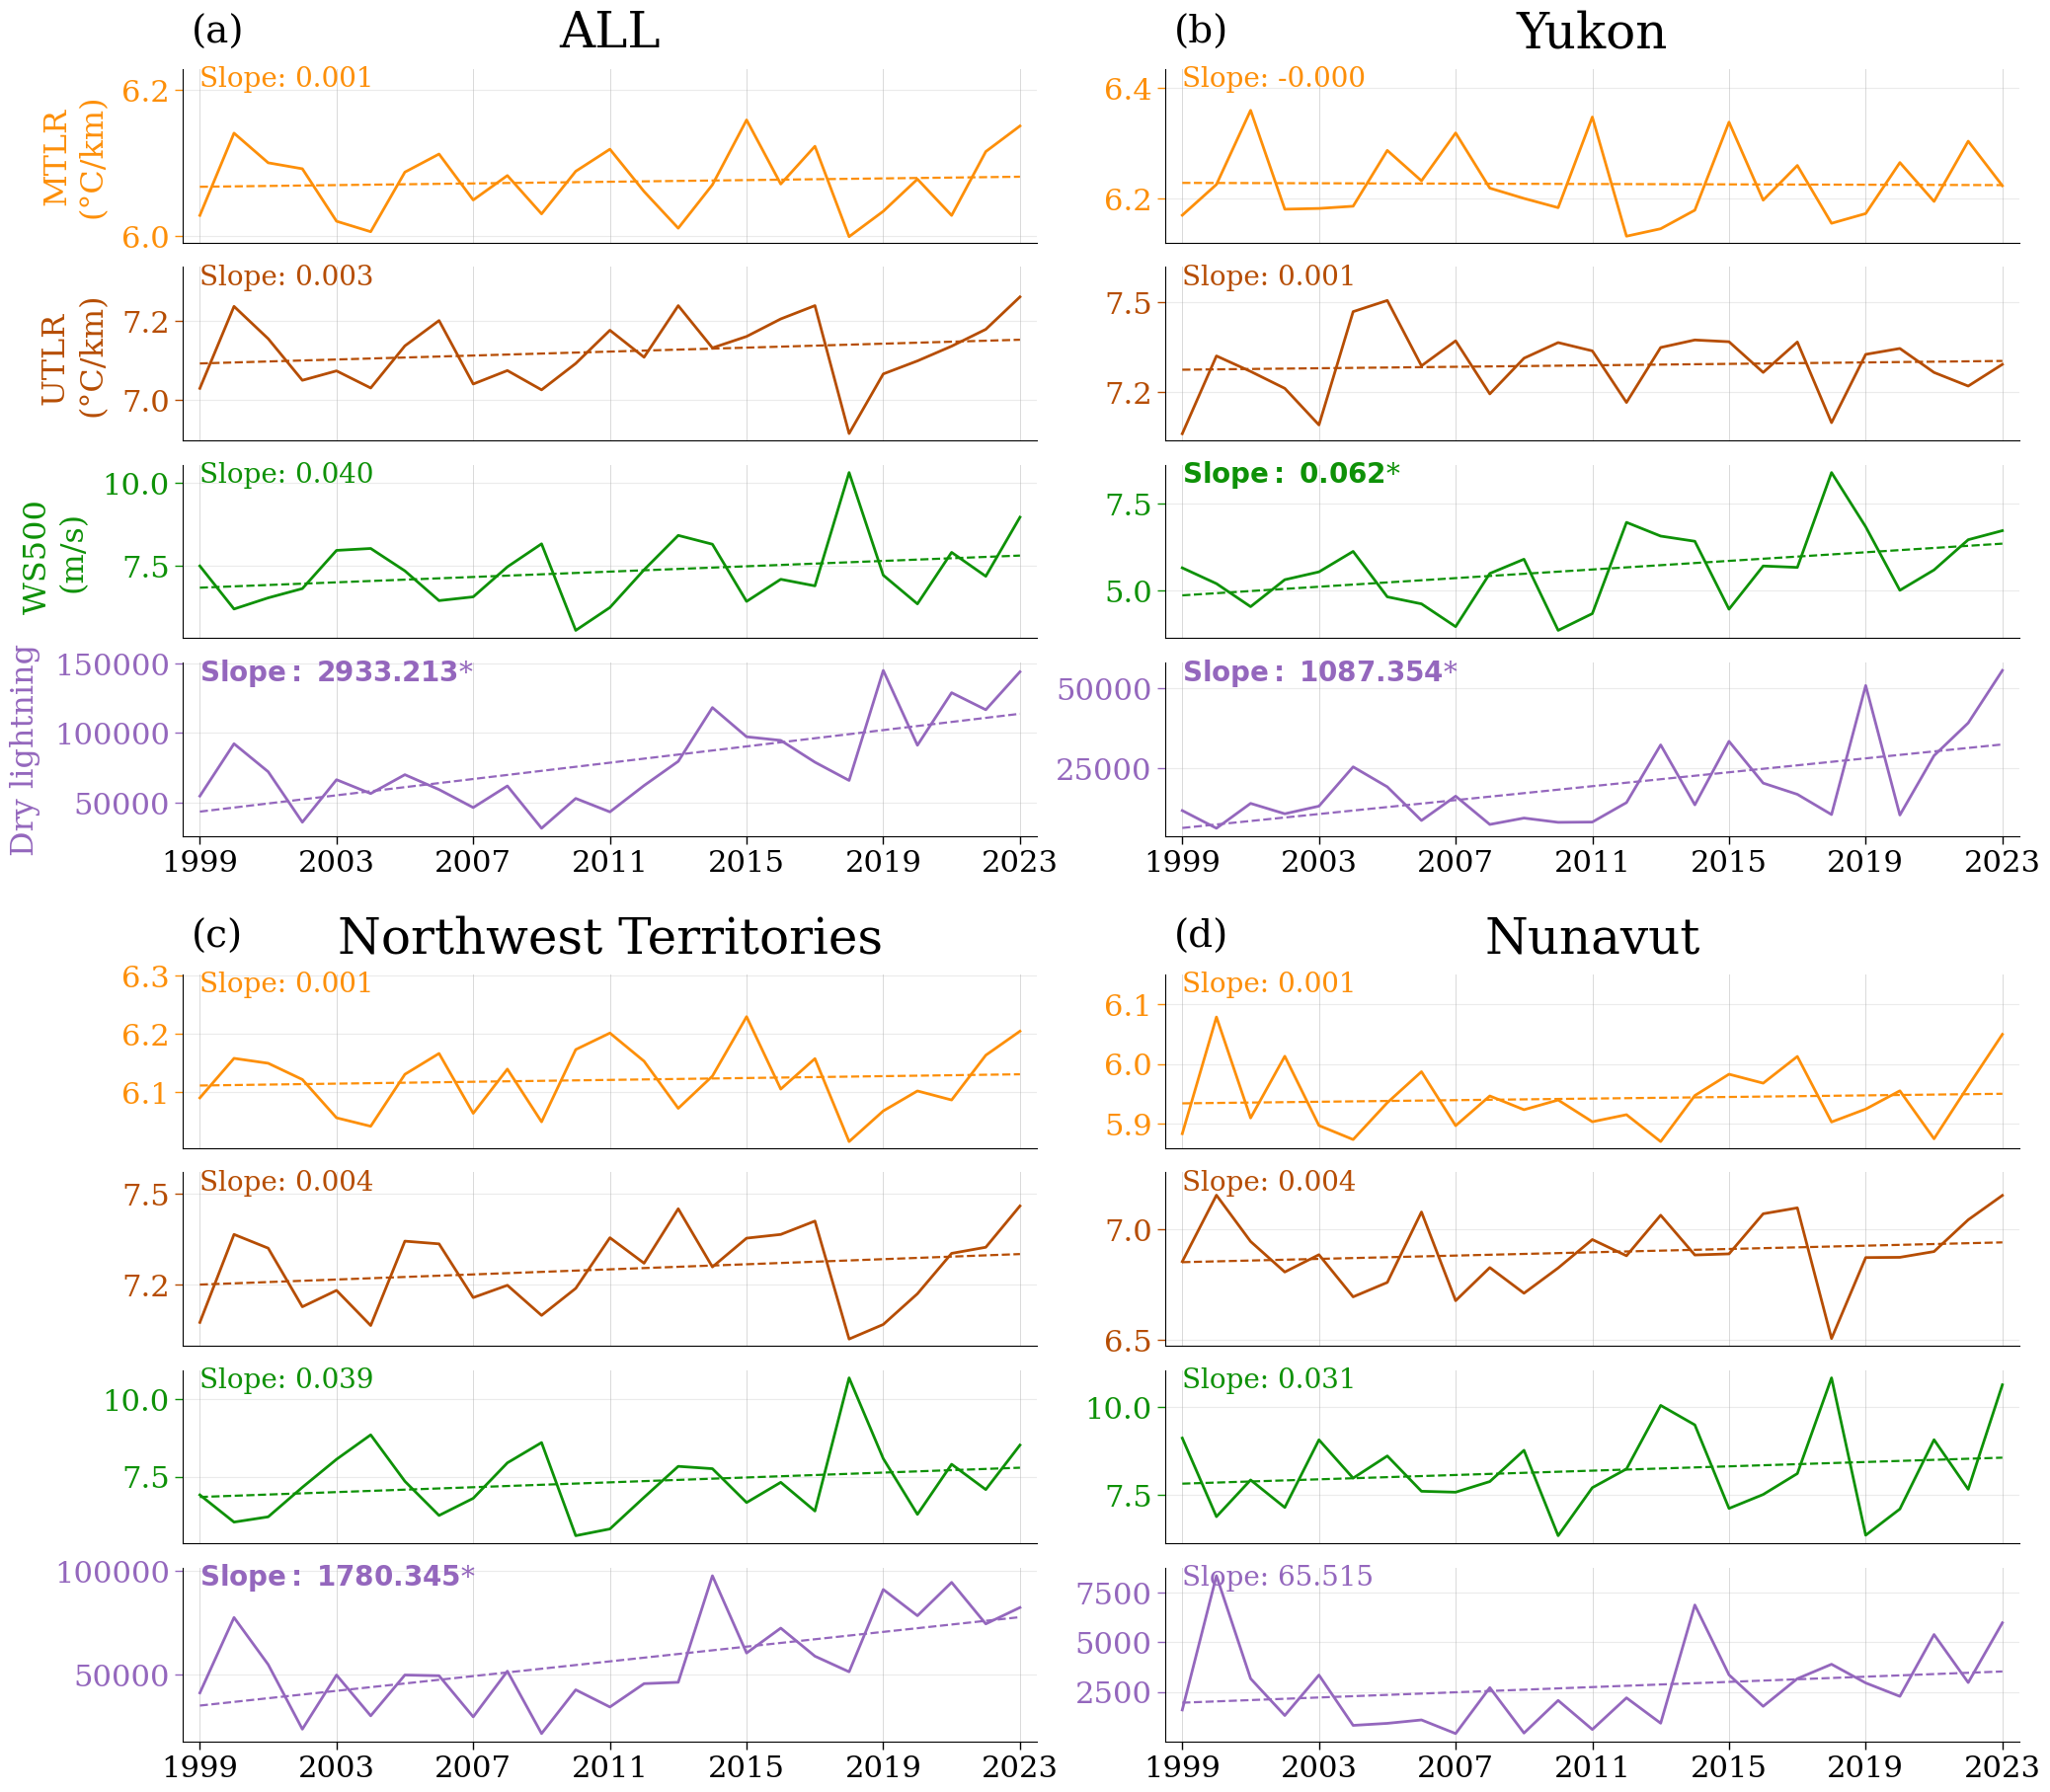


Figure S7. Long-term trends (1999–2023) MTLR, UTLR , WS500 and dry lightning counts for (a) ALL, (b) Yukon, (c) Northwest Territories, and (d) Nunavut. Solid lines show annual seasonal means; dashed lines show ordinary-least-squares linear trend. The annotated slope values are shown on each panel, with boldface and an asterisk (*) indicating statistically significant trends (p < 0.05).

*
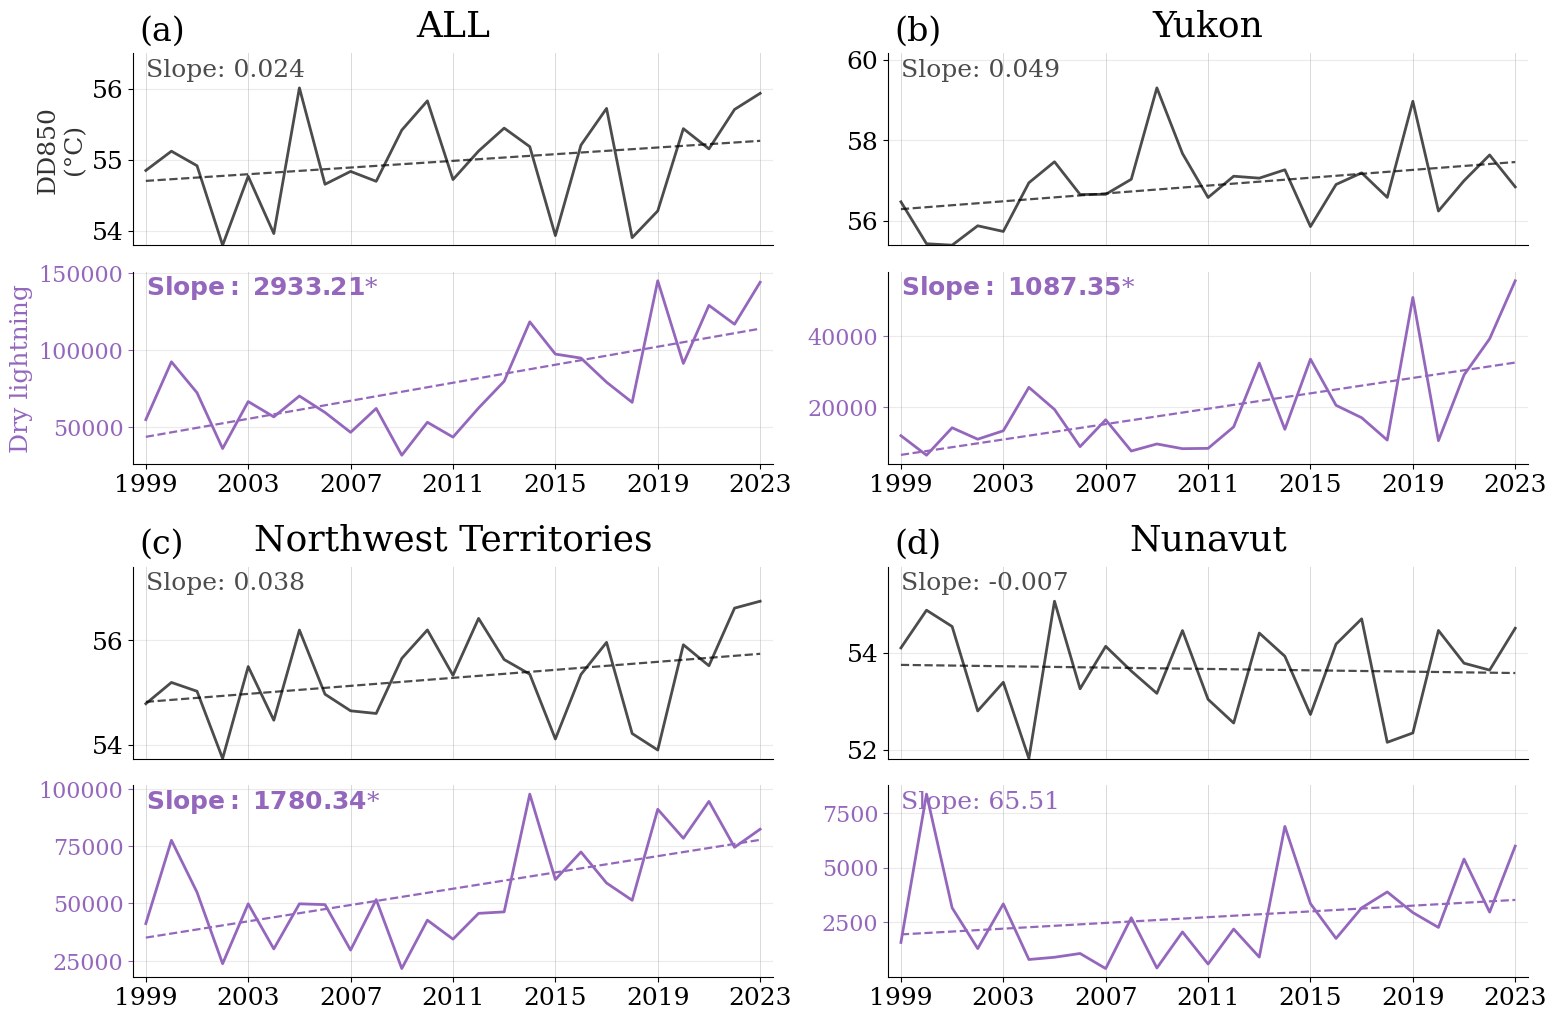
*

Figure S8. Long-term trends (1999–2023) DD850 and dry lightning counts for (a) ALL, (b) Yukon, (c) Northwest Territories, and (d) Nunavut. Solid lines show annual seasonal means; dashed lines show ordinary-least-squares linear trend. The annotated slope values are shown on each panel, with boldface and an asterisk (*) indicating statistically significant trends (p < 0.05).


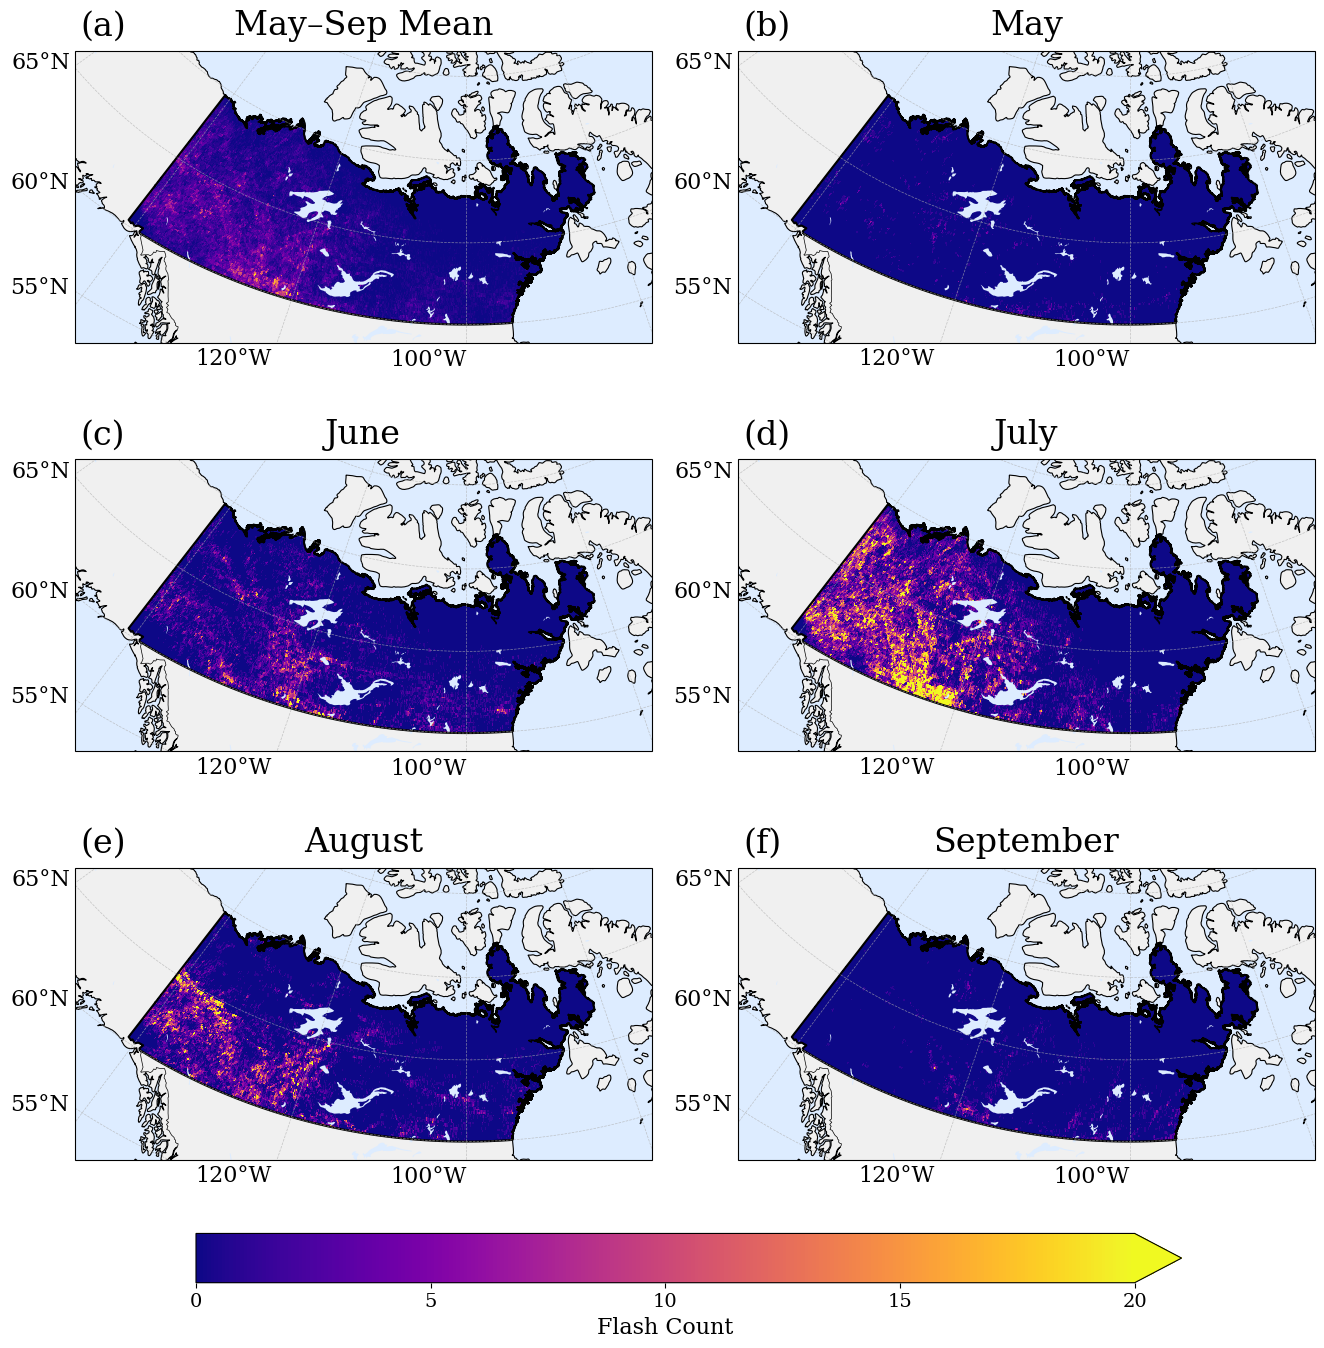
 Figure S9. Spatial patterns of dry-lightning flash counts anomalies across northern Canada in 2023, relative to the 1999–2022 climatology. (a) May–September mean, and for each month from May to September (b–f). Color shading denotes flashes anomaly per grid cell.


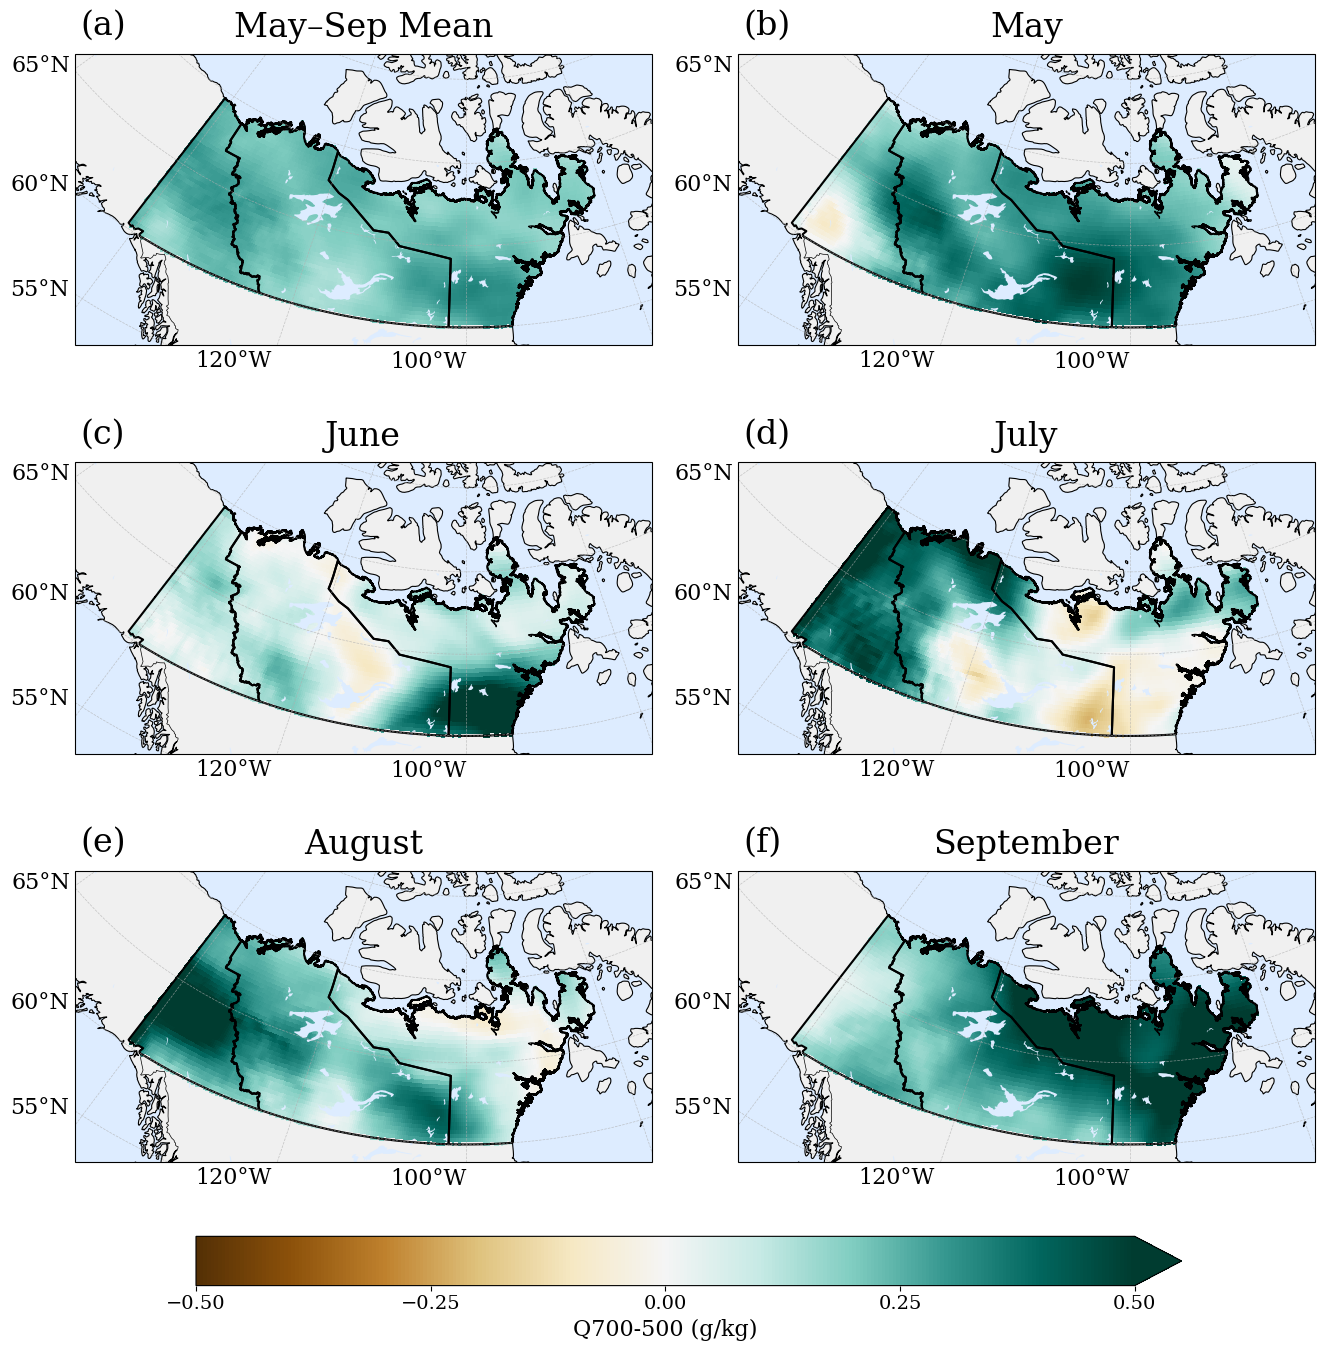


Figure S10. Spatial distribution of 2023 mid-tropospheric moisture (Q700–500, g kg⁻¹) anomalies, relative to the 1999–2022 climatology. averaged over May–September (a) and for each month from May to September (b–f).


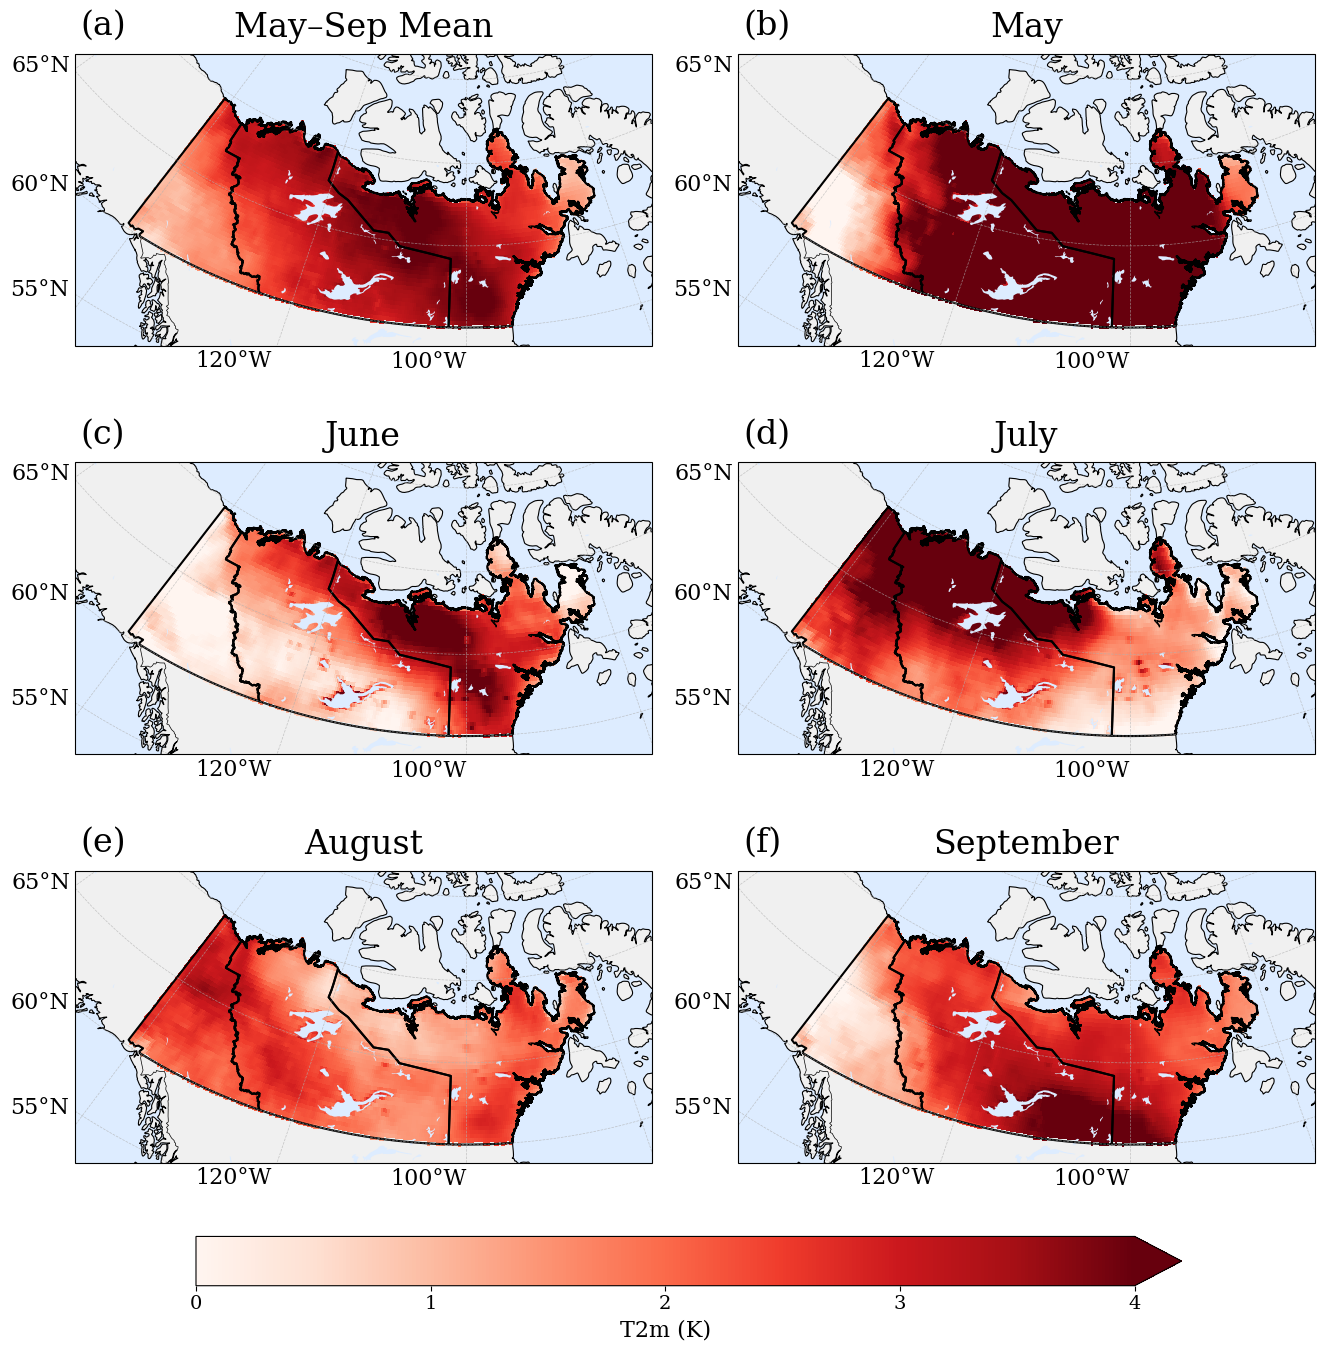


Figure S11. Spatial distribution of 2023 near-surface air temperature (T2m) anomalies, relative to the 1999–2022 climatology. averaged over May–September (a) and for each month from May to September (b–f).


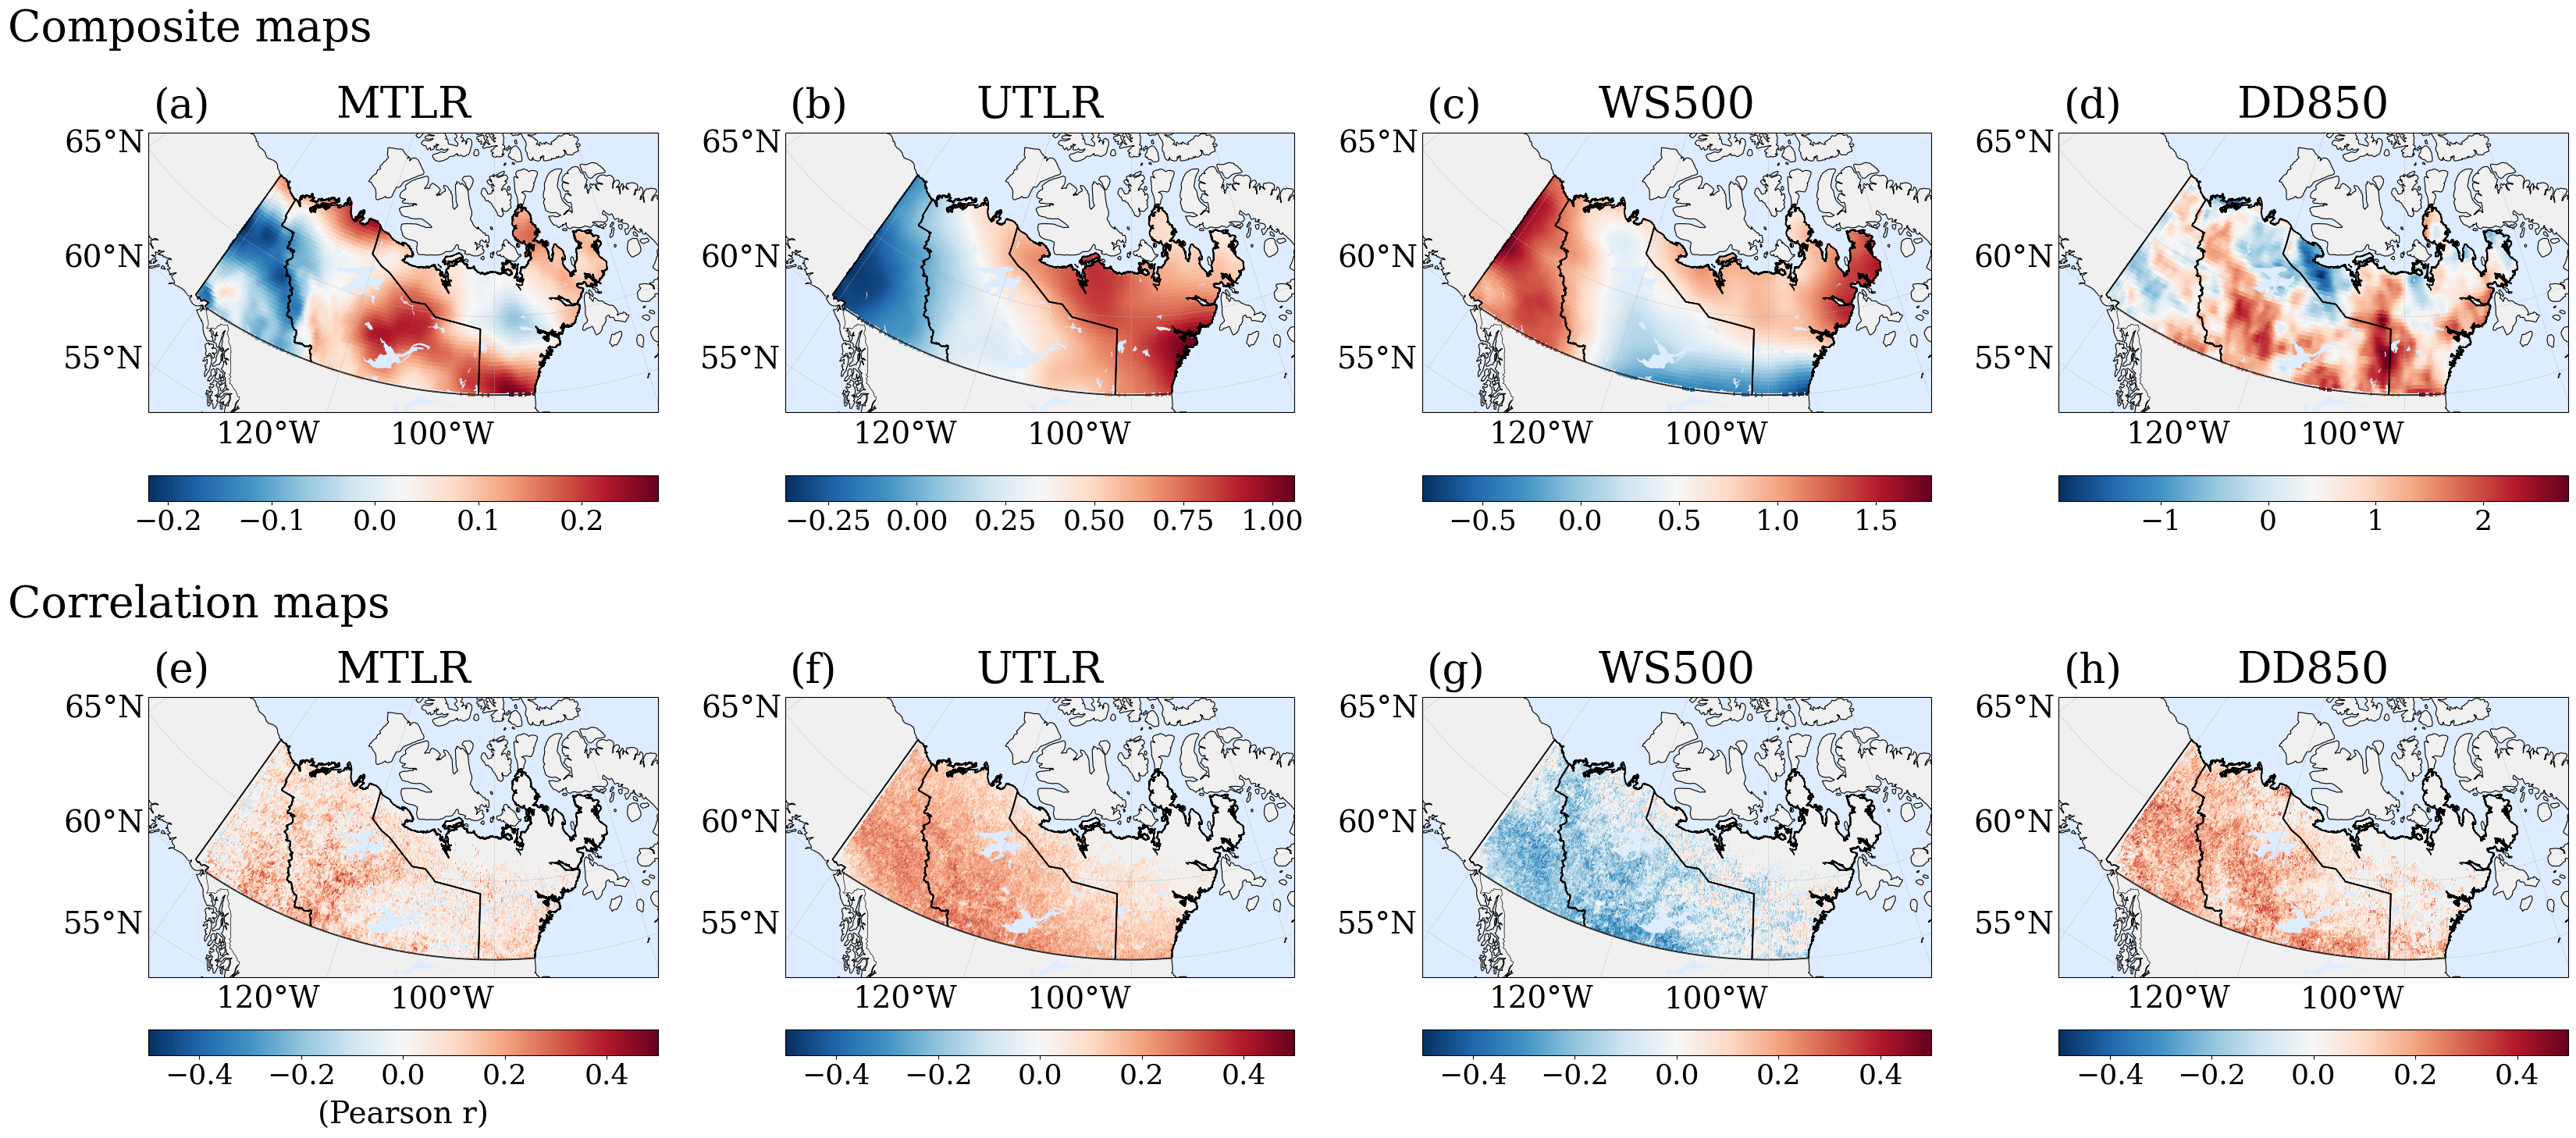


Figure S12. Composite (a–d) and spatial window correlation (d–e) maps of four environmental variables associated with dry-lightning mechanisms (May–September): MTLR (a, e) , UTLR (b, f), WS500 (c, g) and DD850 (d, h).


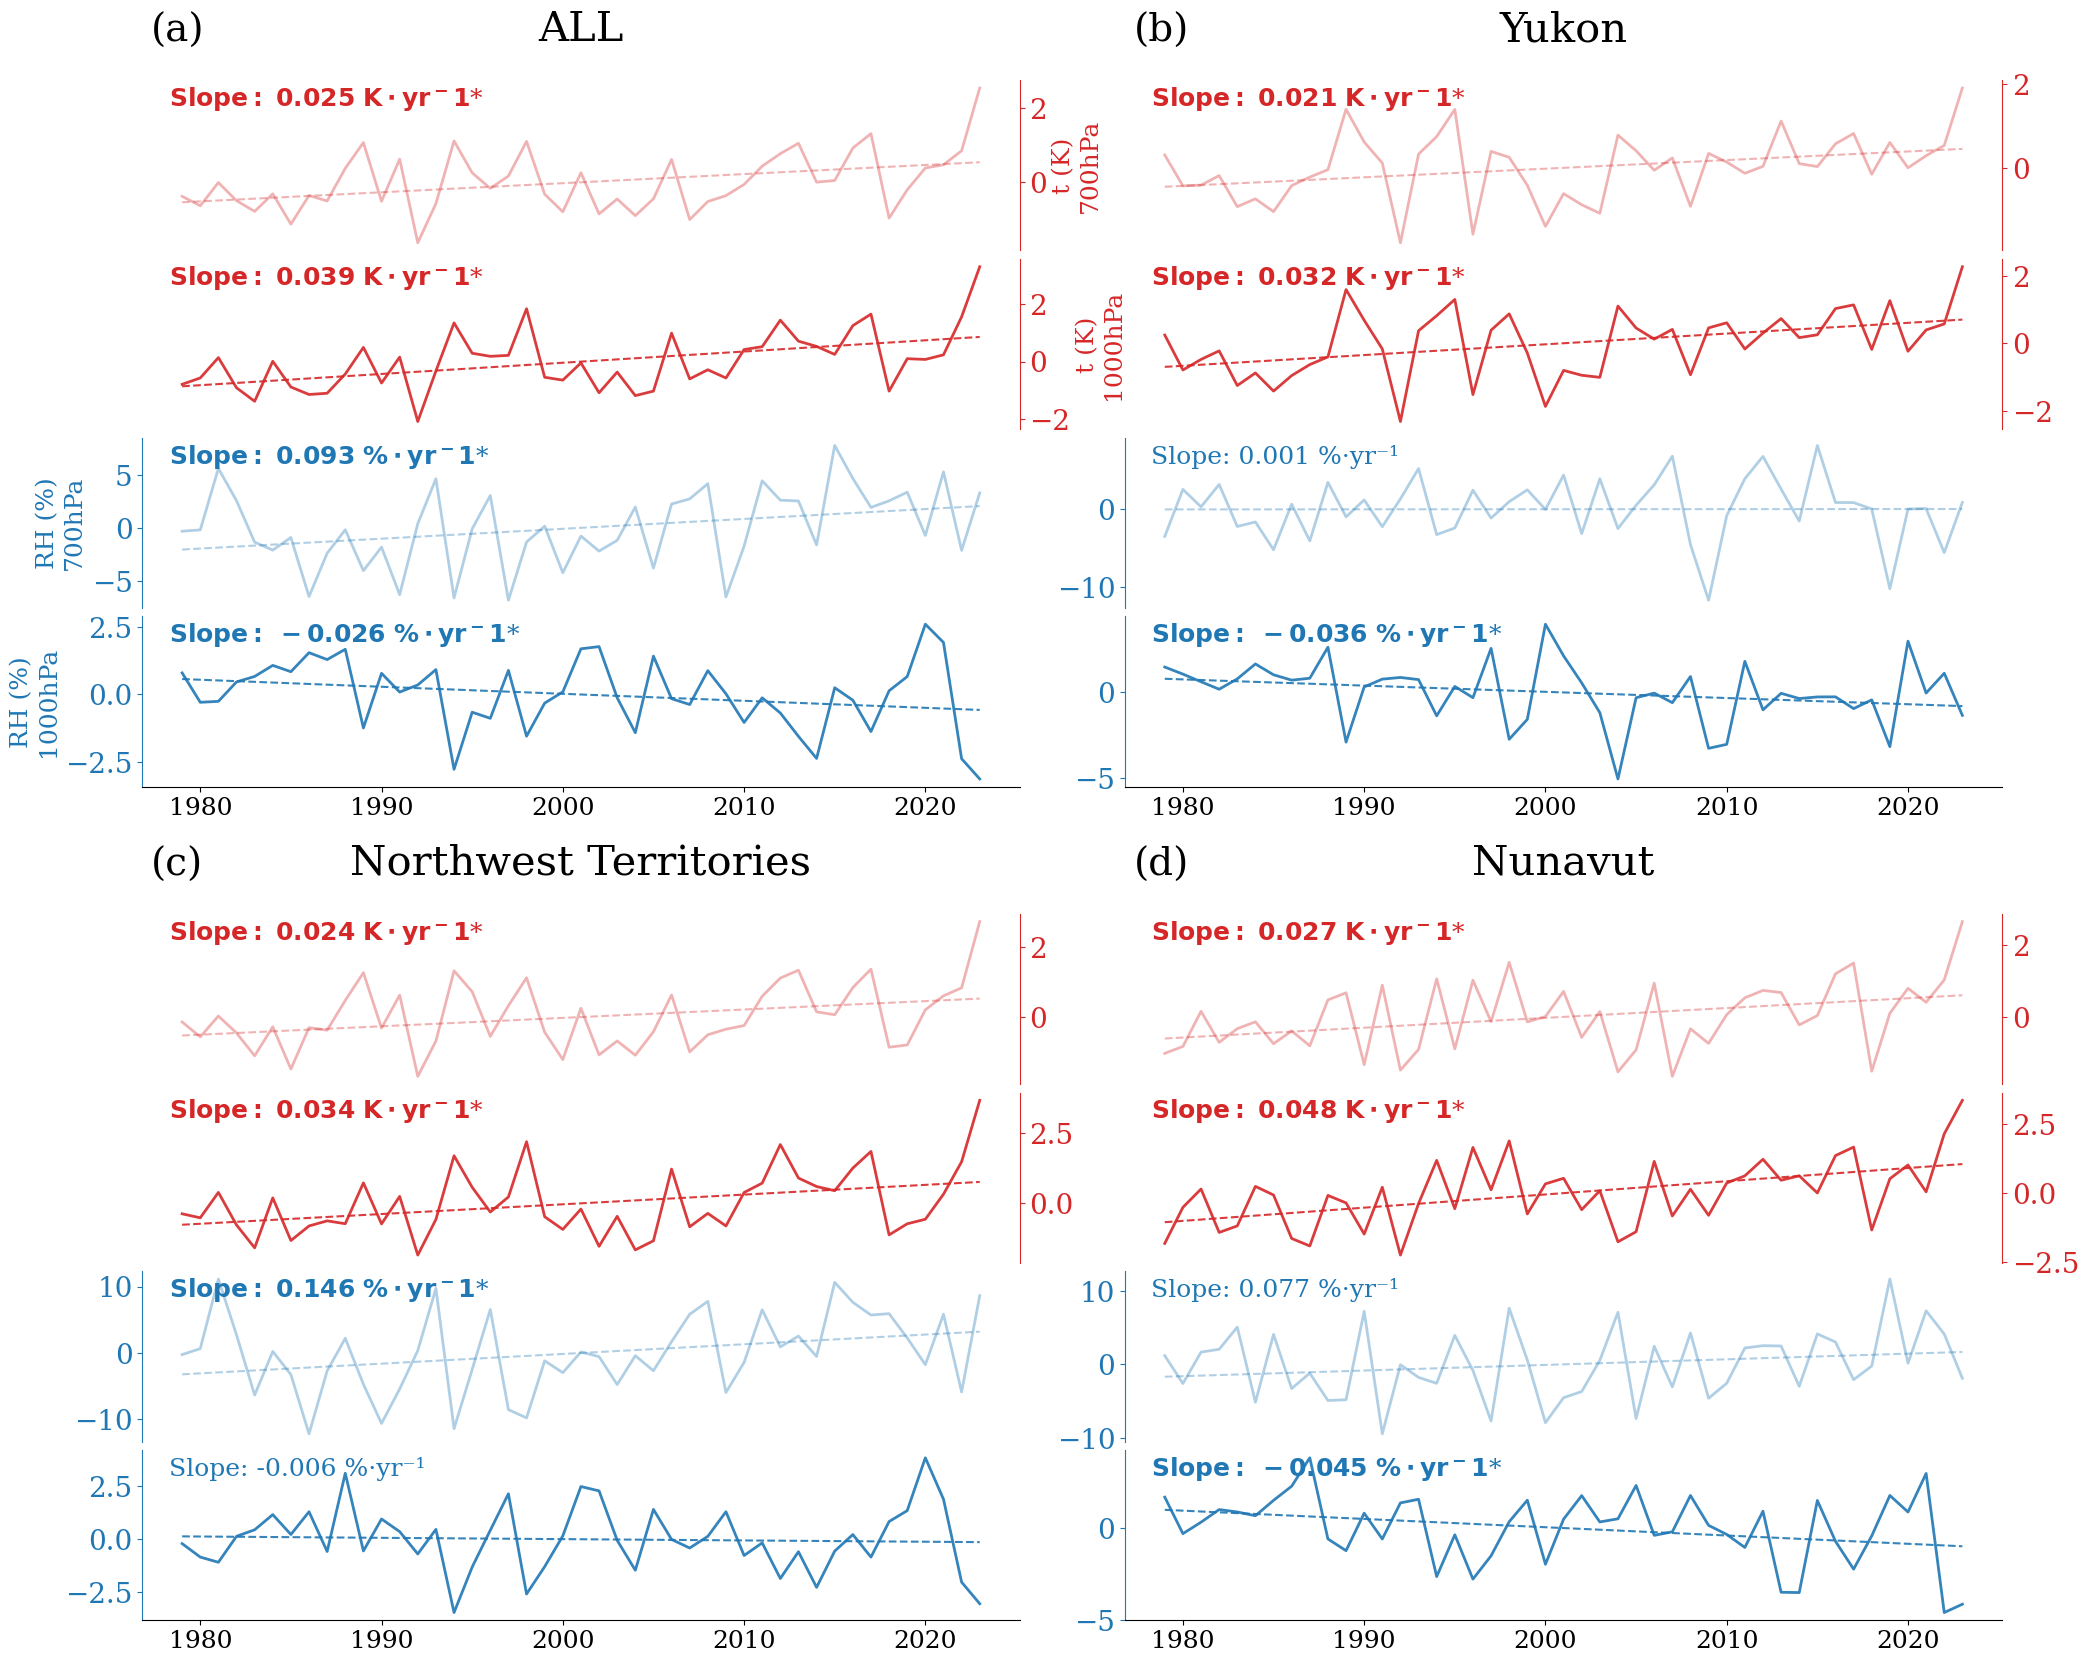


Figure S13. May–September anomalies (1980–2023) of temperature (t, red; right axis) and relative humidity (RH, blue; left axis) at 1000 hPa (dark hues; near-surface) and 700 hPa (light hues; mid-troposphere) for (a) ALL, (b) Yukon, (c) Northwest Territories, and (d) Nunavut. Solid lines indicate annual anomalies, and dashed lines represent linear trends. Boldface and an asterisk (*) denote statistically significant slopes (p < 0.05).


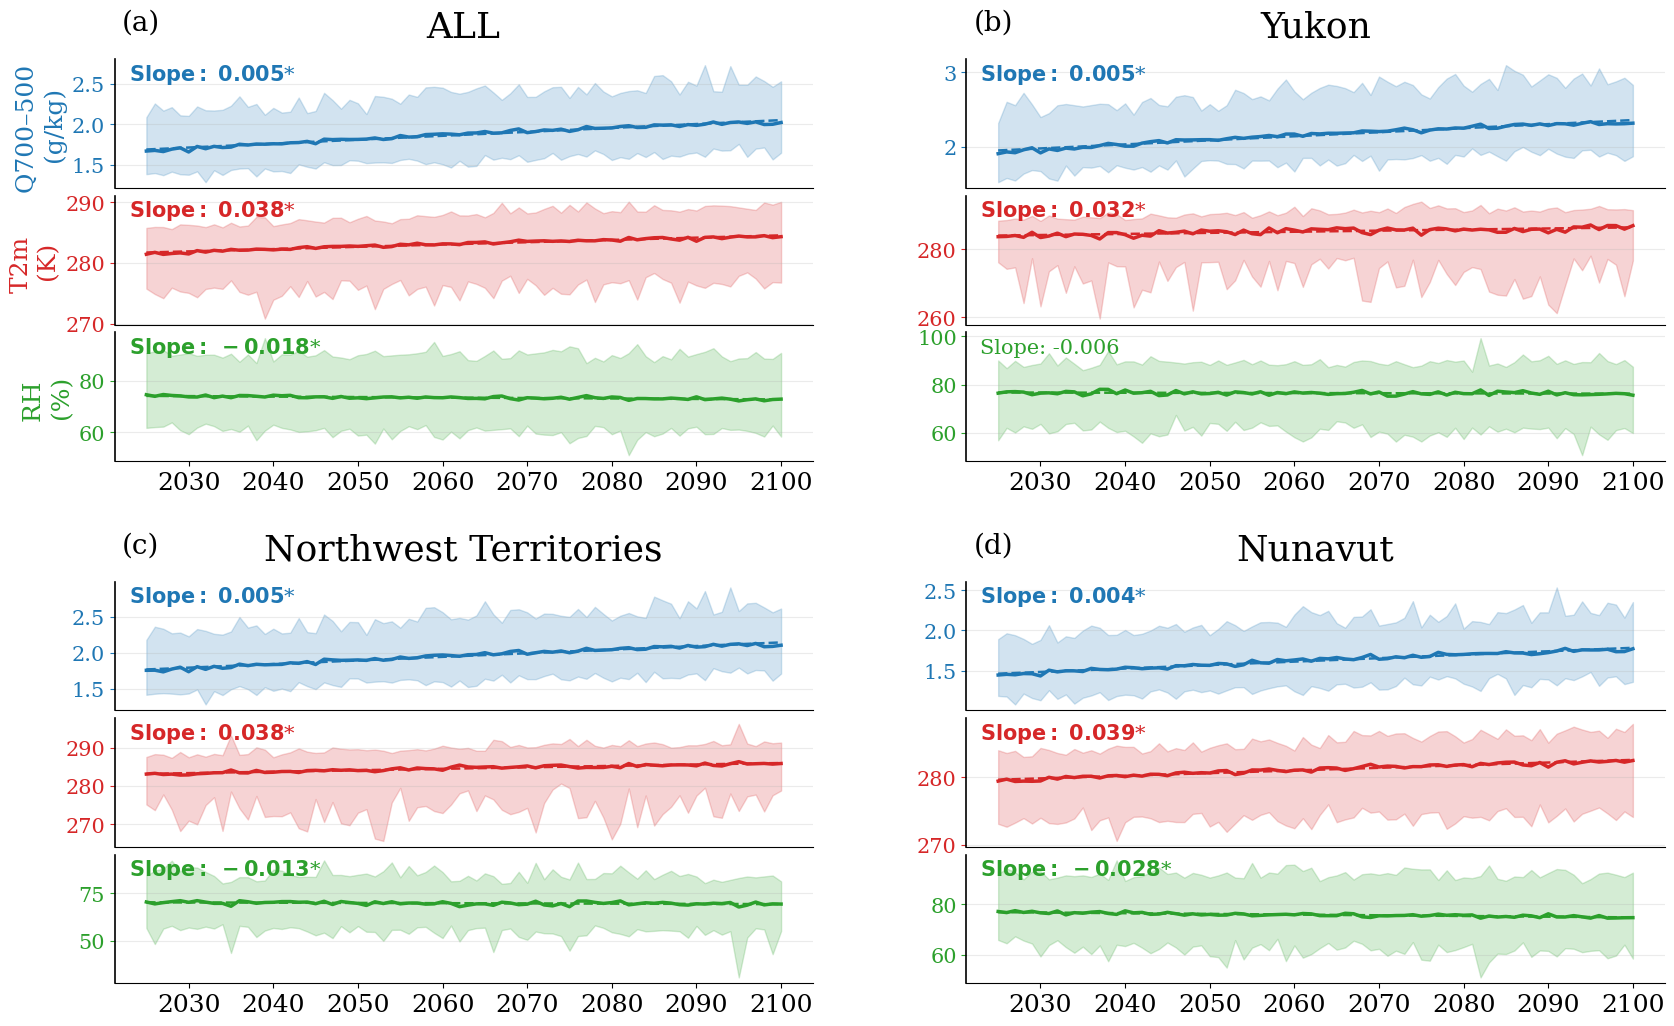


Figure S14. Projected trends in mid-tropospheric moisture (Q700–500), near-surface temperature (T2m), and relative humidity (RH) from 2023 to 2100 under the SSP2-4.5 scenario in the three northern territories of Canada (Yukon, Northwest Territories, and Nunavut). The annotated slope values are shown on each panel, with boldface and an asterisk (*) indicating statistically significant trends (p < 0.05).
